# Supplementary material for: Oral Spirochete Treponema denticola Intraoral Infection Reveals Unique miR-133a, miR-486, miR-126-3p, miR-126-5p miRNA Expression Kinetics during Periodontitis
Source: MDPI journal article supplement (doi:10.3390/ijms241512105), 2023-07-28
Supplement: s1 [file s1]

# Oral spirochete *Treponema denticola* intraoral infection reveals unique miR-133a, miR-486, miR-126-3p, miR-126-5p miRNA expression kinetics during periodontitis.

Chairmandurai Aravindraja <sup>1†</sup>, Syam Jeepipalli <sup>1</sup>, Krishna Mukesh Vekariya <sup>1</sup>, Ruben Botello- Escalante <sup>1</sup>, Edward K. L. Chan <sup>2</sup> and Lakshmyya Kesavalu <sup>1,2\*</sup>

<sup>1</sup> Department of Periodontology, College of Dentistry, University of Florida, Gainesville, FL 32610, USA

<sup>2</sup> Department of Oral Biology, College of Dentistry, University of Florida, Gainesville, FL 32610, USA

\* Correspondence: [Kesavalu@dent.ufl.edu](mailto:Kesavalu@dent.ufl.edu); Tel.: +1-352-273-6500

† Present address: Department of Neurology, College of Medicine, University of Florida, Gainesville, FL 32610, USA.

## Supplemental information

**Table S1.** Downregulated miRNAs during 8-weeks of infection, molecular functions, and target genes.

| miRNAs     | Fold change | p-value | Reported functions                                                                                                    | Number of Target Genes                                                                                                                                                                           |
|------------|-------------|---------|-----------------------------------------------------------------------------------------------------------------------|--------------------------------------------------------------------------------------------------------------------------------------------------------------------------------------------------|
| miR-375    | -2.02       | 0.0421  | Down regulated in oral squamous cell carcinoma [1]. Salivary adenoid cystic carcinoma had downregulated miR-375 [2].  | 276 ( <i>Bmpr2</i> , <i>Mtpn</i> , <i>Klf4</i> , <i>Enah</i> , <i>Fzd8</i> , <i>F10</i> , <i>Zfpn2</i> , <i>Atxn7</i> , <i>Rs1</i> , <i>Tsc1</i> , <i>Pdpk1</i> , <i>Uvssa</i> , <i>Nufip2</i> ) |
| miR-34b-5p | -1.73       | 0.0357  | Enhance the resistance to bleomycin by regulating its target gene TIMP3 during the pathogenesis of lung fibrosis [3]. | 355 ( <i>Arhgap1</i> , <i>Ppp4r2</i> , <i>Dixdc1</i> , <i>Htr2c</i> , <i>Rpap1</i> , <i>N4bp1</i> , <i>Tbc1d2b</i> , <i>Rab3c</i> )                                                              |
| miR-210    | -1.55       | 0.0095  | Induces endothelial dysfunction in type 2 diabetes. Promoting regulatory T-cell signaling in periodontitis [4].       | 16 ( <i>Onecut3</i> , <i>Chst4</i> , <i>Sept8</i> , <i>Gramd1c</i> , <i>Ccdc150</i> )                                                                                                            |
| miR-1902   | -1.54       | 0.0206  | Distinct microRNA expression profiles in mouse renal cortical tissue [5].                                             | 92 ( <i>Tsc1</i> , <i>Spryd3</i> , <i>Lrtm1</i> , <i>Ndufs4</i> , <i>Calm1</i> )                                                                                                                 |
| miR-203    | -1.45       | 0.0026  | Lower in imatinib-resistant GBM cells [6]. Downregulated in colorectal cancer tissues [7].                            | 483 ( <i>Sema3d</i> , <i>Lyzl1</i> , <i>Kat6b</i> , <i>Col22a1</i> , <i>Fbxo33</i> )                                                                                                             |
| miR-376a   | -1.44       | 0.0077  | Downregulated in gastric cancer tissue [8].                                                                           | 06                                                                                                                                                                                               |

|                 |       |          |                                                                                                                                                                                                      |     |
|-----------------|-------|----------|------------------------------------------------------------------------------------------------------------------------------------------------------------------------------------------------------|-----|
| miR-let-7a      | -1.37 | 7.04E-05 | Let-7a-5p was revealed to be downregulated by 21.67% in pneumoconiosis [9]. Downregulation promoted insulin receptor /insulin-like growth factor signaling in pancreatic ductal adenocarcinoma [10]. | 541 |
| miR-148a        | -1.34 | 0.0346   | Downregulated in hypoxia condition of human colorectal cancer cell lines [11].                                                                                                                       | 331 |
| miR-362-3p      | -1.33 | 0.0019   | Aberrant miR-362-3p is associated with EBV-infection and prognosis in Nasopharyngeal Carcinoma [12].                                                                                                 | 883 |
| miR-574-5p      | -1.33 | 0.0182   | Decreasing the HK-2 cells viability in acute kidney injury patients [13].                                                                                                                            | 424 |
| miR-134         | -1.32 | 0.0178   | Significantly downregulated in major depressive disorder [14].                                                                                                                                       | 173 |
| miR-882         | -1.31 | 0.0390   | Osteoclastogenesis models has downregulated levels of miR-882 [15].                                                                                                                                  | 218 |
| miR-678         | -1.3  | 0.0113   | No function reported.                                                                                                                                                                                | 6   |
| mcmv-miR-m108-1 | -1.29 | 0.0340   | No function reported.                                                                                                                                                                                | --  |
| miR-423-5p      | -1.28 | 0.0203   | Effectively regulate the radiosensitivity in colorectal cancer [16].                                                                                                                                 | 216 |
| miR-883a-3p     | -1.27 | 0.0399   | No function reported                                                                                                                                                                                 | 273 |
| miR-202-5p      | -1.27 | 0.0493   | Downregulated levels have a role in myocardial ischemia [17].                                                                                                                                        | 155 |
| miR-let-7f      | -1.26 | 0.0004   | Early stages of epithelial ovarian cancer tissue and serum samples had reduced levels [18].                                                                                                          | 529 |
| miR-187         | -1.26 | 0.0298   | Gastric cancer condition has downregulated levels of miR-187 [19].                                                                                                                                   | 21  |
| miR-let-7c      | -1.25 | 0.0036   | Downregulation had a reported role in pathogenesis of human hepatocellular carcinoma [20].                                                                                                           | 558 |

|            |       |        |                                                                                        |     |
|------------|-------|--------|----------------------------------------------------------------------------------------|-----|
| miR-467e   | -1.23 | 0.0483 |                                                                                        | 83  |
| miR-29b    | -1.22 | 0.0048 | Fibrous plaques of Peyronie's disease has downregulated expression [21].               | 452 |
| miR-23a    | -1.17 | 0.0186 | Regulating the functions of inflammatory response in the septic insult condition [22]. | 546 |
| miR-98     | -1.14 | 0.0181 | Reported functions of tumor development in pancreatic ductal adenocarcinoma [23].      | 541 |
| miR-let-7e | -1.1  | 0.0155 | Downregulated levels observed in the cerebral palsy condition [24].                    | 538 |

18

19 **Table S2.** Downregulated miRNAs during 16-weeks infection, molecular functions, and target  
20 genes.

| miRNAs     | Fold change | p-value  | Reported functions                                                                                                       | Number of Target Genes                                                             |
|------------|-------------|----------|--------------------------------------------------------------------------------------------------------------------------|------------------------------------------------------------------------------------|
| miR-2135   | -1.48       | 3.61E-05 | Downregulated in the analgesic and addictive drug – morphine addiction [25].                                             | --                                                                                 |
| miR-142-3p | -1.39       | 0.0226   | Enhanced IFN- $\gamma$ expression observed in downregulated levels [26].                                                 | 215 ( <i>Dcald</i> , <i>Rarg</i> , <i>Atg4c</i> , <i>Tbc1d2b</i> , <i>Fkbp1a</i> ) |
| miR-130a   | -1.25       | 0.0067   | Oral squamous cell carcinoma can be controlled by downregulated levels [27].                                             | 366 ( <i>Zfp113</i> , <i>Slain1</i> , <i>Apcdd1</i> , <i>Sos2</i> , <i>Mtf1</i> )  |
| miR-720    | -1.24       | 0.0047   | Promoting insulin secretion in MIN6 cells [28].                                                                          | --                                                                                 |
| miR-1274a  | -1.22       | 0.0137   | Patients with colon cancer have increased survival rate on downregulated miR-1274a [29].                                 | No target gene detected                                                            |
| miR-10a    | -1.22       | 0.0236   | Downregulated in the wound healing process [30].                                                                         | 178 ( <i>Nup50</i> , <i>Nr6a1</i> , <i>Epha5</i> , <i>Sobp</i> , <i>Wipf1</i> )    |
| miR-151-3p | -1.21       | 2.87E-05 | Mice with cardiac hypertrophy have downregulated levels of miR-151-3p [31].                                              | 57                                                                                 |
| miR-496    | -1.21       | 0.0107   | Gastric cancer cells of AGS and MKN45 has downregulated levels of miR-496 which affects AKT/mTOR signaling pathway [32]. | 113                                                                                |

|             |       |        |                                                                                                                                                    |     |
|-------------|-------|--------|----------------------------------------------------------------------------------------------------------------------------------------------------|-----|
| miR-125b-5p | -1.2  | 0.0121 | Small extracellular vesicles present in aging related diseases has downregulated expression of miR-125-5p levels [33].                             | 496 |
| miR-323-3p  | -1.19 | 0.0169 | Significant downregulation observed in Pancreatic ductal adenocarcinoma tissue and cell lines [34].                                                | 356 |
| miR-195     | -1.18 | 0.0176 | Downregulated levels in hepatocellular carcinoma [35].                                                                                             | 583 |
| miR-582-5p  | -1.16 | 0.0174 | Bladder cancer cells and tissue has decreased expression [36].                                                                                     | 396 |
| miR-1944    | -1.16 | 0.0176 | Observed in cognitive impairment condition of Alzheimer's disease [37].                                                                            | --  |
| miR-106b    | -1.16 | 0.0179 | Attenuating the inflammation response in collagen-induced arthritis [38] and downregulated in mycobacterial infection [39].                        | 761 |
| miR-324-5p  | -1.15 | 0.0173 | Oxygen glucose deprivation mediated neurological injury has downregulated levels [40].                                                             | 19  |
| miR-15a     | -1.11 | 0.0348 | Downregulated levels observed in Apelin-mediated lung cancer development [41].                                                                     | --  |
| miR-16      | -1.11 | 0.0465 | Decreased the apoptotic rate in hypoxia/reoxygenation damage [42].                                                                                 | --  |
| miR-25      | -1.1  | 0.0275 | Downregulated in the inflamed tracheal smooth muscle cells [43].                                                                                   |     |
| miR-107     | -1.1  | 0.0449 | Downregulated miR-107 expression was associated with advanced Ann Arbor stage, high IPI score, LDH, and $\beta$ 2-MG level in DLBCL patients [13]. | 369 |

22 **Table S3.** Comparison of downregulated miRNAs between 8-weeks and 16-weeks of infection,  
 23 molecular functions, and target genes.

| miRNAs      | Fold change | p-value | Reported functions                                                                                                         | Number of Target Genes                              |
|-------------|-------------|---------|----------------------------------------------------------------------------------------------------------------------------|-----------------------------------------------------|
| miR-2135    | -1.77       | 0.0001  | Downregulated in the analgesic and addictive drug – morphine [25].                                                         | No target gene detected                             |
| miR-2133    | -1.58       | 0.0024  | Downregulated in macrophage transition of M0 to M2a in microglia [44].                                                     | No target gene detected                             |
| miR-223     | -1.57       | 0.0159  | <i>Streptococcus</i> inflammation in murine macrophages decreased miR-223 levels [45].                                     | 222 ( <i>Orc4, Armcx1, Gpr155, Zbtb18, Pknox1</i> ) |
| miR-142-3p  | -1.44       | 0.0299  | Enhanced IFN- $\gamma$ expression observed under downregulated levels [26].                                                | 215 ( <i>Dcakd, Rarg, Atg4c, Tbc1d2b, Fkbp1a</i> )  |
| miR-130a    | -1.35       | 0.0006  | Oral squamous cell carcinoma can be controlled by downregulated levels [27].                                               | 366 ( <i>Zfp113, Slain1, Apcdd1, Sos2, Mtf1</i> )   |
| miR-342-3p  | -1.27       | 0.0077  | Downregulated in Hepatocellular carcinoma condition [46].                                                                  | 309 ( <i>Apmmap, Prkaa2, Trim39, Sla, Pde6h</i> )   |
| miR-496     | -1.26       | 0.0006  | Gastric cancer cells of AGS and MKN45 has downregulated levels of miR-496 which affecting AKT/mTOR signaling pathway [32]. | 113                                                 |
| miR-150     | -1.25       | 0.0088  | Myasthenia gravis condition has downregulated levels [47].                                                                 | 248                                                 |
| miR-720     | -1.22       | 0.0019  | Promoting insulin secretion in MIN6 cells [28].                                                                            | --                                                  |
| miR-125b-5p | -1.22       | 0.0043  | Small extracellular vesicles present in aging related diseases has downregulated expression of miR-125-5p levels [33].     | 496                                                 |
| miR-451     | -1.21       | 0.0382  | Downregulated in Nasopharyngeal carcinoma [48].                                                                            | 17                                                  |
| miR-15a     | -1.18       | 0.01    | Downregulated levels observed in Apelin- mediated lung cancer development [41].                                            | --                                                  |
| miR-338-3p  | -1.17       | 0.0492  | Decreased levels observed in LO2 cells of hepatocellular carcinoma [49].                                                   | 319                                                 |
| miR-1944    | -1.16       | 0.0239  | Observed in cognitive impairment condition of Alzheimer's disease [37].                                                    | --                                                  |

|            |       |        |                                                                                                                                |     |
|------------|-------|--------|--------------------------------------------------------------------------------------------------------------------------------|-----|
| miR-99a    | -1.15 | 0.0313 | Downregulation of miRNA 99a in oral squamous cell carcinomas contributes to the growth and survival of oral cancer cells [50]. | 15  |
| miR-25     | -1.13 | 0.0019 | Downregulated in the inflamed tracheal smooth muscle cells [43].                                                               | 369 |
| miR-151-3p | -1.13 | 0.0092 | Mice with cardiac hypertrophy demonstrated downregulated levels of miR-151-3p [31].                                            | 57  |
| miR-324-5p | -1.07 | 0.0466 | Oxygen glucose deprivation mediated neurological injury has downregulated levels [40].                                         | 19  |

---

**Table S4.** miRTarBase analysis of upregulated DE microRNAs and their target genes in 8 weeks *T. denticola* infection.

| miRTarBase ID | miRNA           | Target gene    |
|---------------|-----------------|----------------|
| MIRT000604    | mmu-miR-133a-3p | <i>Nfatc4</i>  |
| MIRT001959    | mmu-miR-133a-3p | <i>Runx2</i>   |
| MIRT002895    | mmu-miR-133a-3p | <i>Cdc42</i>   |
| MIRT002896    | mmu-miR-133a-3p | <i>Whsc2</i>   |
| MIRT002897    | mmu-miR-133a-3p | <i>Rhoa</i>    |
| MIRT004022    | mmu-miR-133a-3p | <i>Ucp2</i>    |
| MIRT004102    | mmu-miR-133a-3p | <i>Casp9</i>   |
| MIRT004267    | mmu-miR-133a-3p | <i>Spry1</i>   |
| MIRT004652    | mmu-miR-133a-3p | <i>Ccnd2</i>   |
| MIRT004653    | mmu-miR-133a-3p | <i>Srf</i>     |
| MIRT004833    | mmu-miR-133a-3p | <i>Hdac4</i>   |
| MIRT005400    | mmu-miR-133a-3p | <i>Pola1</i>   |
| MIRT006261    | mmu-miR-133a-3p | <i>Igf1r</i>   |
| MIRT015113    | mmu-miR-133a-5p | <i>Rhoa</i>    |
| MIRT053603    | mmu-miR-133a-3p | <i>Prdm16</i>  |
| MIRT054781    | mmu-miR-133a-3p | <i>Kcnmb1</i>  |
| MIRT438724    | mmu-miR-133a-3p | <i>Rapgef3</i> |
| MIRT438725    | mmu-miR-133a-3p | <i>Prkacb</i>  |
| MIRT438726    | mmu-miR-133a-3p | <i>Adcy6</i>   |
| MIRT438727    | mmu-miR-133a-3p | <i>Adrb1</i>   |
| MIRT593588    | mmu-miR-133a-3p | <i>Zfp26</i>   |
| MIRT594422    | mmu-miR-133a-3p | <i>Gdf3</i>    |
| MIRT599889    | mmu-miR-133a-3p | <i>Acer1</i>   |
| MIRT604592    | mmu-miR-133a-3p | <i>Tnrc6b</i>  |
| MIRT743586    | mmu-miR-133a    | <i>Acer1</i>   |
| MIRT746521    | mmu-miR-133a    | <i>Tnrc6b</i>  |
| MIRT748596    | mmu-miR-133a    | <i>Zfp26</i>   |
| MIRT749511    | mmu-miR-133a    | <i>Gdf3</i>    |

We used mmu-miR-133 as an example for an upregulated DE miRNA during 8 weeks of infection in identifying the target genes using the miRTarBase. Each miRNA has different target genes and each with a specific MiRTarBase ID. *T. denticola*-infection induced DE upregulated mmu-miR-133 has 28 different target genes with 28 different MiRTarBase ID as stated in the table.

33 **Table S5.** miRTarBase analysis of upregulated DE microRNAs and their target genes in 16  
34 weeks *T. denticola* infection.

| miRTarBase ID | miRNA           | Target gene    |
|---------------|-----------------|----------------|
| MIRT744264    | mmu-miR-486     | <i>H2-Q4</i>   |
| MIRT747084    | mmu-miR-486     | <i>Maoa</i>    |
| MIRT750467    | mmu-miR-486     | <i>Zcchc9</i>  |
| MIRT744588    | mmu-miR-486     | <i>Ms4a6c</i>  |
| MIRT746127    | mmu-miR-486     | <i>Cnnm3</i>   |
| MIRT747348    | mmu-miR-486     | <i>Tbc1d8b</i> |
| MIRT744650    | mmu-miR-486     | <i>Nkain3</i>  |
| MIRT742609    | mmu-miR-486     | <i>Shc4</i>    |
| MIRT749957    | mmu-miR-486     | <i>Tns3</i>    |
| MIRT745593    | mmu-miR-486     | <i>Aim2</i>    |
| MIRT748160    | mmu-miR-486     | <i>Gm7609</i>  |
| MIRT753322    | mmu-miR-486     | <i>Fam129c</i> |
| MIRT598720    | mmu-miR-486a-5p | <i>H2-Q4</i>   |
| MIRT598358    | mmu-miR-486a-5p | <i>Maoa</i>    |
| MIRT590827    | mmu-miR-486a-5p | <i>Zcchc9</i>  |
| MIRT606321    | mmu-miR-486a-5p | <i>Ms4a6c</i>  |
| MIRT601041    | mmu-miR-486a-5p | <i>Cnnm3</i>   |
| MIRT597071    | mmu-miR-486a-5p | <i>Tbc1d8b</i> |
| MIRT598042    | mmu-miR-486a-5p | <i>Nkain3</i>  |
| MIRT581056    | mmu-miR-486a-5p | <i>Shc4</i>    |
| MIRT592961    | mmu-miR-486a-5p | <i>Tns3</i>    |
| MIRT599803    | mmu-miR-486a-5p | <i>Aim2</i>    |
| MIRT598800    | mmu-miR-486a-5p | <i>Gm7609</i>  |
| MIRT578874    | mmu-miR-486a-5p | <i>Fam129c</i> |
| MIRT003791    | mmu-miR-486a-5p | <i>Pax7</i>    |
| MIRT003527    | mmu-miR-486a-5p | <i>Pten</i>    |
| MIRT004586    | mmu-miR-486a-5p | <i>Foxo1</i>   |
| MIRT736452    | mmu-miR-486a-5p | <i>Igf2bp3</i> |
| MIRT598721    | mmu-miR-486b-5p | <i>H2-Q4</i>   |
| MIRT598359    | mmu-miR-486b-5p | <i>Maoa</i>    |
| MIRT590828    | mmu-miR-486b-5p | <i>Zcchc9</i>  |



|            |                 |                |
|------------|-----------------|----------------|
| MIRT606320 | mmu-miR-486b-5p | <i>Ms4a6c</i>  |
| MIRT601040 | mmu-miR-486b-5p | <i>Cnnm3</i>   |
| MIRT597070 | mmu-miR-486b-5p | <i>Tbc1d8b</i> |
| MIRT598043 | mmu-miR-486b-5p | <i>Nkain3</i>  |
| MIRT581057 | mmu-miR-486b-5p | <i>Shc4</i>    |
| MIRT592960 | mmu-miR-486b-5p | <i>Tns3</i>    |
| MIRT599804 | mmu-miR-486b-5p | <i>Aim2</i>    |
| MIRT598799 | mmu-miR-486b-5p | <i>Gm7609</i>  |
| MIRT578873 | mmu-miR-486b-5p | <i>Fam129c</i> |
| MIRT736777 | mmu-miR-486b-3p | <i>Pten</i>    |

We used mmu-miR-486 an example for an upregulated DE miRNA during 16 weeks of infection in identifying the target genes using the miRTarBase. Each miRNA has different target genes and each with a specific MiRTarBase ID. *T. denticola*-infection induced DE upregulated mmu-miR-486 has 41 different target genes with 41 different MiRTarBase ID as stated in the table.

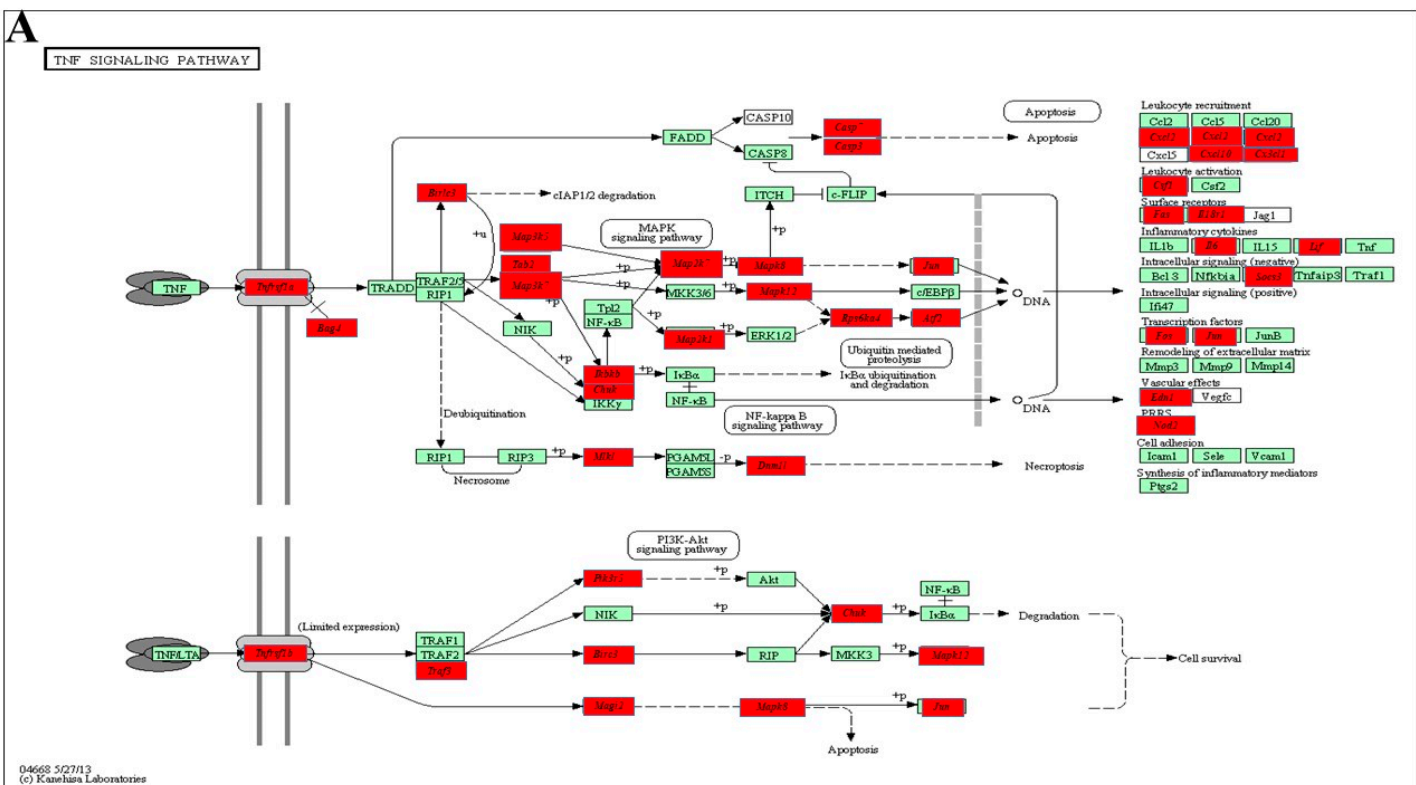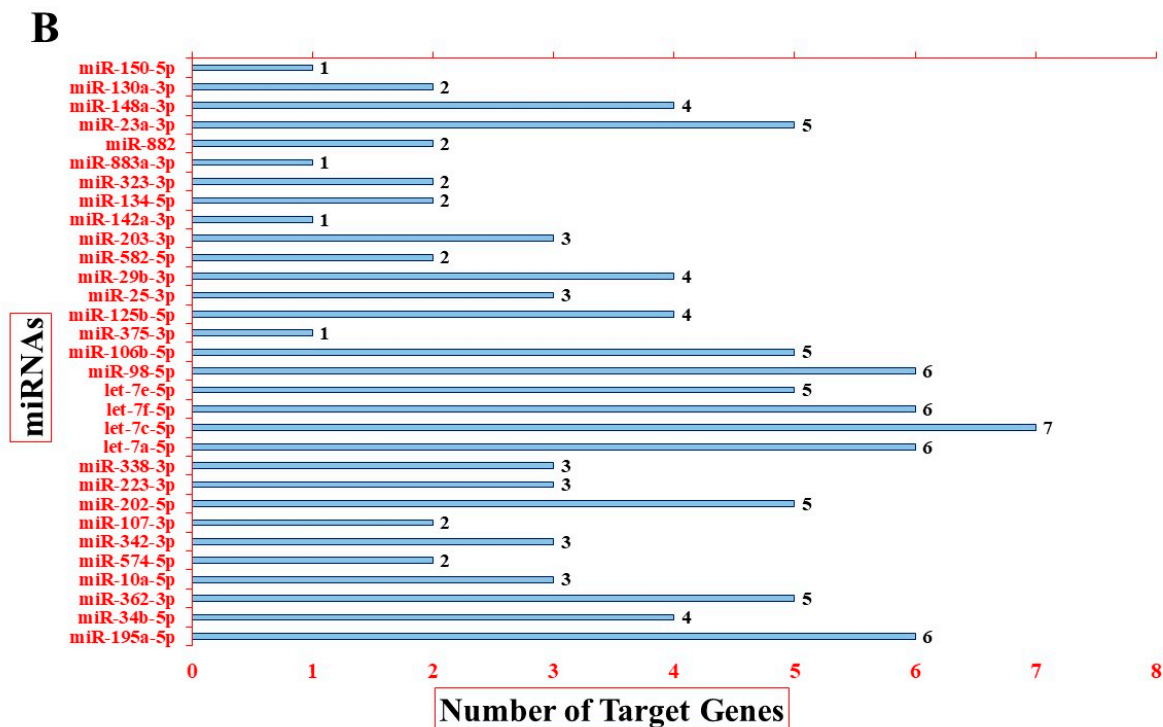

**Figure S1.** Significant differentially expressed (DE) genes (identified by KEGG) involved in the TNF signaling pathway (A). Red boxes indicate significantly altered expression of genes (e.g. leucocyte recruitment genes Cxcl2, Cxcl10; leucocyte activation gene Csf1; inflammatory cytokine genes IL-6, lif) based on *T. denticola*-induced miRNA profiles from Nanostring analysis. List of miRNAs and their target genes associated with TNF signaling pathway (B).

## 48    **References**

- 49    1.     Siow, M.Y.; Ng, L.P.; Vincent-Chong, V.K.; Jamaludin, M.; Abraham, M.T.; Abdul  
50       Rahman, Z.A.; Kallarakkal, T.G.; Yang, Y.H.; Cheong, S.C.; Zain, R.B. Dysregulation of  
51       miR-31 and miR-375 expression is associated with clinical outcomes in oral carcinoma.  
52       *Oral Dis* **2014**, *20*, 345-351, doi:10.1111/odi.12118.
- 53    2.     Mitani, Y.; Roberts, D.B.; Fatani, H.; Weber, R.S.; Kies, M.S.; Lippman, S.M.; El-Naggar,  
54       A.K. MicroRNA profiling of salivary adenoid cystic carcinoma: association of miR-17-92  
55       upregulation with poor outcome. *PLoS One* **2013**, *8*, e66778,  
56       doi:10.1371/journal.pone.0066778.
- 57    3.     Lu, Y.Y.; Zhang, X.J. MiR-34b-5p knockdown attenuates bleomycin-induced pulmonary  
58       fibrosis by targeting tissue inhibitor of metalloproteinase 3 (TIMP3). *Rivista europea per le*  
59       *scienze mediche e farmacologiche = European review for medical and pharmacological sciences.*  
60       **2019**, *23*, 2273-2279, doi:10.26355/eurrev\_201903\_17276.
- 61    4.     Parachuru, V.P.; Coates, D.E.; Milne, T.J.; Hussaini, H.M.; Rich, A.M.; Seymour, G.J.  
62       Forkhead box P3-positive regulatory T-cells and interleukin 17-positive T-helper 17 cells  
63       in chronic inflammatory periodontal disease. *J Periodontal Res* **2014**, *49*, 817-826,  
64       doi:10.1111/jre.12169.
- 65    5.     Schuler, E.; Parris, T.Z.; Helou, K.; Forssell-Aronsson, E. Distinct microRNA expression  
66       profiles in mouse renal cortical tissue after 177Lu-octreotate administration. *PLoS One*  
67       **2014**, *9*, e112645, doi:10.1371/journal.pone.0112645.
- 68    6.     Liao, H.Z.; Bai, Y.F.; Qiu, S.C.; Zheng, L.; Huang, L.Y.; Liu, T.Z.; Wang, X.; Liu, Y.T.; Xu,  
69       N.B.; Yan, X.H.; et al. MiR-203 downregulation is responsible for chemoresistance in  
70       human glioblastoma by promoting epithelial-mesenchymal transition via SNAIL2.  
71       *Oncotarget* **2015**, *6*, 8914-8928, doi:DOI 10.18632/oncotarget.3563.
- 72    7.     Deng, B.; Wang, B.; Fang, J.; Zhu, X.; Cao, Z.; Lin, Q.; Zhou, L.; Sun, X. MiRNA-203  
73       suppresses cell proliferation, migration and invasion in colorectal cancer via targeting of  
74       EIF5A2. *Sci Rep* **2016**, *6*, 28301, doi:10.1038/srep28301.
- 75    8.     Zhang, C.; Liang, Y.; Ma, M.H.; Wu, K.Z.; Zhang, C.D.; Dai, D.Q. Downregulation of  
76       microRNA-376a in Gastric Cancer and Association with Poor Prognosis. *Cell Physiol*  
77       *Biochem* **2018**, *51*, 2010-2018, doi:10.1159/000495820.
- 78    9.     Zhang, L.; Hao, C.; Zhai, R.; Wang, D.; Zhang, J.; Bao, L.; Li, Y.; Yao, W. Downregulation  
79       of exosomal let-7a-5p in dust exposed- workers contributes to lung cancer development.  
80       *Respir Res* **2018**, *19*, 235, doi:10.1186/s12931-018-0949-y.
- 81    10.    Nweke, E.E.; Brand, M. Downregulation of the let-7 family of microRNAs may promote  
82       insulin receptor/insulin-like growth factor signalling pathways in pancreatic ductal  
83       adenocarcinoma. *Oncol Lett* **2020**, *20*, 2613-2620, doi:10.3892/ol.2020.11854.
- 84    11.    Nersisyan, S.; Galatenko, A.; Chekova, M.; Tonevitsky, A. Hypoxia-Induced miR-148a  
85       Downregulation Contributes to Poor Survival in Colorectal Cancer. *Front Genet* **2021**, *12*,  
86       662468, doi:10.3389/fgene.2021.662468.
- 87    12.    Wang, X.Y.; Chen, P. Aberrant miR-362-3p is Associated with EBV-Infection and  
88       Prognosis in Nasopharyngeal Carcinoma and Involved in Tumor Progression by  
89       Targeting JMJD2A. *Oncotargets and Therapy* **2022**, *15*, 121-131, doi:10.2147/Ott.S325100.
- 90    13.    Liu, S.; Zhao, L.; Zhang, L.; Qiao, L.; Gao, S. Downregulation of miR-574-5p inhibits HK-  
91       2 cell viability and predicts the onset of acute kidney injury in sepsis patients. *Ren Fail*  
92       **2021**, *43*, 942-948, doi:10.1080/0886022X.2021.1939051.

14. Zhang, H.P.; Liu, X.L.; Chen, J.J.; Cheng, K.; Bai, S.J.; Zheng, P.; Zhou, C.J.; Wang, W.; Wang, H.Y.; Zhong, L.M.; et al. Circulating microRNA 134 sheds light on the diagnosis of major depressive disorder. *Transl Psychiatry* **2020**, *10*, 95, doi:10.1038/s41398-020-0773-2.
15. Tian, Y.; Gong, Z.; Zhao, R.; Zhu, Y. Melatonin inhibits RANKL-induced osteoclastogenesis through the miR-882/Rev-erba axis in Raw264.7 cells. *Int J Mol Med* **2021**, *47*, 633-642, doi:10.3892/ijmm.2020.4820.
16. Shang, Y.; Wang, L.; Zhu, Z.; Gao, W.; Li, D.; Zhou, Z.; Chen, L.; Fu, C.G. Downregulation of miR-423-5p Contributes to the Radioresistance in Colorectal Cancer Cells. *Front Oncol* **2020**, *10*, 582239, doi:10.3389/fonc.2020.582239.
17. Li, Y.; Li, Q.; Zhang, O.; Guan, X.; Xue, Y.; Li, S.; Zhuang, X.; Zhou, B.; Miao, G. miR-202-5p protects rat against myocardial ischemia reperfusion injury by downregulating the expression of Trpv2 to attenuate the Ca (2+) overload in cardiomyocytes. *J Cell Biochem* **2019**, *120*, 13680-13693, doi:10.1002/jcb.28641.
18. Kumar, V.; Gupta, S.; Varma, K.; Chaurasia, A.; Sachan, M. Diagnostic performance of microRNA-34a, let-7f and microRNA-31 in epithelial ovarian cancer prediction. *J Gynecol Oncol* **2022**, *33*, e49, doi:10.3802/jgo.2022.33.e49.
19. Chen, W.; Cui, Y.; Wang, J.; Yuan, Y.; Sun, X.; Zhang, L.; Shen, S.; Cheng, J. Effects of downregulated expression of microRNA-187 in gastric cancer. *Exp Ther Med* **2018**, *16*, 1061-1070, doi:10.3892/etm.2018.6318.
20. Zhu, X.; Wu, L.; Yao, J.; Jiang, H.; Wang, Q.; Yang, Z.; Wu, F. MicroRNA let-7c Inhibits Cell Proliferation and Induces Cell Cycle Arrest by Targeting CDC25A in Human Hepatocellular Carcinoma. *PLoS One* **2015**, *10*, e0124266, doi:10.1371/journal.pone.0124266.
21. Dos Santos, V.G.; Dos Santos, G.A.; Neto, C.B.; Viana, N.I.; Pimenta, R.; Guimarães, V.R.; Candido, P.; Romão, P.; de Camargo, J.A.; Leite, K.R.M.; et al. Downregulation of miR-29b is associated with Peyronie's disease. *Urologia* **2022**, *89*, 451-455, doi:10.1177/03915603211036628.
22. Si, X.; Cao, D.; Chen, J.; Nie, Y.; Jiang, Z.; Chen, M.Y.; Wu, J.F.; Guan, X.D. miR-23a downregulation modulates the inflammatory response by targeting ATG12-mediated autophagy. *Mol Med Rep* **2018**, *18*, 1524-1530, doi:10.3892/mmr.2018.9081.
23. Fu, Y.; Liu, X.; Chen, Q.; Liu, T.; Lu, C.; Yu, J.; Miao, Y.; Wei, J. Downregulated miR-98-5p promotes PDAC proliferation and metastasis by reversely regulating MAP4K4. *J Exp Clin Cancer Res* **2018**, *37*, 130, doi:10.1186/s13046-018-0807-2.
24. Vechetti, I.J.; Norrbom, J.; Alkner, B.; Hjalmarsson, E.; Palmcrantz, A.; Pontén, E.; Pingel, J.; von Walden, F.; Fernandez-Gonzalo, R. Extracellular vesicle characteristics and microRNA content in cerebral palsy and typically developed individuals at rest and in response to aerobic exercise. *Front Physiol* **2022**, *13*, 1072040, doi:10.3389/fphys.2022.1072040.
25. Wang, T.; Chen, X.; Zeng, K. Molecular mechanism and candidate biomarkers of morphine for analgesia and addiction effects. *Ann Transl Med* **2022**, *10*, 89, doi:10.21037/atm-21-7037.
26. Ma, N.; Wei, T.; Wang, B.; Jiang, X.; Zhou, L.; Zhong, R. MicroRNA-142-3p inhibits IFN-γ production via targeting of RICTOR in. *Ann Transl Med* **2019**, *7*, 649, doi:10.21037/atm.2019.10.85.
27. Peng, Y.; Hu, S.; Zhang, K.; Wang, Y.; Rouzi, M.; Zhou, D.; Yang, R. Downregulation of MicroRNA-130a Inhibits Oral Squamous Cell Carcinoma Proliferation and Metastasis via the Hippo-YAP Pathway. *Cancer Manag Res* **2021**, *13*, 4829-4840, doi:10.2147/CMAR.S287575.

- 141 28. Lu, C.; Wang, D.; Feng, Y.; Feng, L.; Li, Z. miR-720 Regulates Insulin Secretion by  
142 Targeting Rab35. *Biomed Res Int* **2021**, 2021, 6662612, doi:10.1155/2021/6662612.
- 143 29. Ren, B.; Yang, B.; Li, P.; Ge, L. Upregulation of MiR-1274a is Correlated with Survival  
144 Outcomes and Promotes Cell Proliferation, Migration, and Invasion of Colon Cancer.  
145 *Onco Targets Ther* **2020**, 13, 6957-6966, doi:10.2147/OTT.S246160.
- 146 30. Simões, A.; Chen, L.; Chen, Z.; Zhao, Y.; Gao, S.; Marucha, P.T.; Dai, Y.; DiPietro, L.A.;  
147 Zhou, X. Differential microRNA profile underlies the divergent healing responses in skin  
148 and oral mucosal wounds. *Sci Rep* **2019**, 9, 7160, doi:10.1038/s41598-019-43682-w.
- 149 31. Wei, H.; Li, Z.; Wang, X.; Wang, J.; Pang, W.; Yang, G.; Shen, Q.W. microRNA-151-3p  
150 regulates slow muscle gene expression by targeting ATP2a2 in skeletal muscle cells. *J Cell*  
151 *Physiol* **2015**, 230, 1003-1012, doi:10.1002/jcp.24793.
- 152 32. Su, R.; Zhao, E.; Zhang, J. miR-496 inhibits proliferation via LYN and AKT pathway in  
153 gastric cancer. *Open Med (Wars)* **2021**, 16, 1206-1214, doi:10.1515/med-2021-0313.
- 154 33. Kim, C.G.; Lee, J.K.; Cho, G.J.; Shin, O.S.; Gim, J.A. Small RNA sequencing of small  
155 extracellular vesicles secreted by umbilical cord mesenchymal stem cells following  
156 replicative senescence. *Genes Genomics* **2023**, 45, 347-358, doi:10.1007/s13258-022-01297-y.
- 157 34. Wang, C.; Liu, P.; Wu, H.; Cui, P.; Li, Y.; Liu, Y.; Liu, Z.; Gou, S. MicroRNA-323-3p inhibits  
158 cell invasion and metastasis in pancreatic ductal adenocarcinoma via direct suppression  
159 of SMAD2 and SMAD3. *Oncotarget* **2016**, 7, 14912-14924, doi:10.18632/oncotarget.7482.
- 160 35. Yu, S.; Jing, L.; Yin, X.R.; Wang, M.C.; Chen, Y.M.; Guo, Y.; Nan, K.J.; Han, L.L. MiR-195  
161 suppresses the metastasis and epithelial-mesenchymal transition of hepatocellular  
162 carcinoma by inhibiting YAP. *Oncotarget* **2017**, 8, 99757-99771,  
163 doi:10.18632/oncotarget.20909.
- 164 36. Tian, Y.; Guan, Y.; Su, Y.; Luo, W.; Yang, G.; Zhang, Y. MiR-582-5p Inhibits Bladder  
165 Cancer-Genesis by Suppressing TTK Expression. *Cancer Manag Res* **2020**, 12, 11933-11944,  
166 doi:10.2147/CMAR.S274835.
- 167 37. Chum, P.P.; Hakim, M.A.; Behringer, E.J. Cerebrovascular microRNA Expression Profile  
168 During Early Development of Alzheimer's Disease in a Mouse Model. *J Alzheimers Dis*  
169 **2022**, 85, 91-113, doi:10.3233/JAD-215223.
- 170 38. Tao, Y.; Wang, Z.; Wang, L.; Shi, J.; Guo, X.; Zhou, W.; Wu, X.; Liu, Y.; Zhang, W.; Yang,  
171 H.; et al. Downregulation of miR-106b attenuates inflammatory responses and joint  
172 damage in collagen-induced arthritis. *Rheumatology (Oxford)* **2017**, 56, 1804-1813,  
173 doi:10.1093/rheumatology/kex233.
- 174 39. Pires, D.; Bernard, E.M.; Pombo, J.P.; Carmo, N.; Fialho, C.; Gutierrez, M.G.; Bettencourt,  
175 P.; Anes, E. Modulates miR-106b-5p to Control Cathepsin S Expression Resulting in  
176 Higher Pathogen Survival and Poor T-Cell Activation. *Front Immunol* **2017**, 8, 1819,  
177 doi:10.3389/fimmu.2017.01819.
- 178 40. Gu, J.; Gui, S.; Hu, L.; Kong, L.; Di, M.; Wang, Y. Downregulated miRNA-324-5p  
179 aggravates neuronal injury induced by oxygen-glucose deprivation via modulating RAN.  
180 *Exp Ther Med* **2020**, 19, 658-664, doi:10.3892/etm.2019.8249.
- 181 41. Ran, J.; Li, Y.; Liu, L.; Zhu, Y.; Ni, Y.; Huang, H.; Liu, Z.; Miao, Z.; Zhang, L. Apelin  
182 enhances biological functions in lung cancer A549 cells by downregulating exosomal miR-  
183 15a-5p. *Carcinogenesis* **2021**, 42, 243-253, doi:10.1093/carcin/bgaa089.
- 184 42. Zhang, H.J.; Zhang, Y.N.; Teng, Z.Y. Downregulation of miR-16 protects H9c2(2-1) cells  
185 against hypoxia/reoxygenation damage by targeting CIAPIN1 and regulating the NF-κB  
186 pathway. *Mol Med Rep* **2019**, 20, 3113-3122, doi:10.3892/mmr.2019.10568.
- 187 43. Sárközy, M.; Kahán, Z.; Csont, T. A myriad of roles of miR-25 in health and disease.  
188 *Oncotarget* **2018**, 9, 21580-21612, doi:10.18632/oncotarget.24662.

44. Freilich, R.W.; Woodbury, M.E.; Ikezu, T. Integrated expression profiles of mRNA and miRNA in polarized primary murine microglia. *PLoS One* **2013**, *8*, e79416, doi:10.1371/journal.pone.0079416.
45. Li, G.; Zong, X.; Cheng, Y.; Xu, J.; Deng, J.; Huang, Y.; Ma, C.; Fu, Q. miR-223-3p contributes to suppressing NLRP3 inflammasome activation in *Streptococcus equi* ssp. *zooepidemicus* infection. *Vet Microbiol* **2022**, *269*, 109430, doi:10.1016/j.vetmic.2022.109430.
46. Komoll, R.M.; Hu, Q.; Olarewaju, O.; von Döhlen, L.; Yuan, Q.; Xie, Y.; Tsay, H.C.; Daon, J.; Qin, R.; Manns, M.P.; et al. MicroRNA-342-3p is a potent tumour suppressor in hepatocellular carcinoma. *J Hepatol* **2021**, *74*, 122-134, doi:10.1016/j.jhep.2020.07.039.
47. Cron, M.A.; Maillard, S.; Truffault, F.; Gualeni, A.V.; Gloghini, A.; Fadel, E.; Guihaire, J.; Behin, A.; Berrih-Aknin, S.; Le Panse, R. Causes and Consequences of miR-150-5p Dysregulation in Myasthenia Gravis. *Front Immunol* **2019**, *10*, 539, doi:10.3389/fimmu.2019.00539.
48. Liu, N.; Jiang, N.; Guo, R.; Jiang, W.; He, Q.M.; Xu, Y.F.; Li, Y.Q.; Tang, L.L.; Mao, Y.P.; Sun, Y.; et al. MiR-451 inhibits cell growth and invasion by targeting MIF and is associated with survival in nasopharyngeal carcinoma. *Mol Cancer* **2013**, *12*, 123, doi:10.1186/1476-4598-12-123.
49. Fu, X.; Tan, D.; Hou, Z.; Hu, Z.; Liu, G. miR-338-3p is down-regulated by hepatitis B virus X and inhibits cell proliferation by targeting the 3'-UTR region of CyclinD1. *Int J Mol Sci* **2012**, *13*, 8514-8539, doi:10.3390/ijms13078514.
50. Yan, B.; Fu, Q.; Lai, L.; Tao, X.; Fei, Y.; Shen, J.; Chen, Z.; Wang, Q. Downregulation of microRNA 99a in oral squamous cell carcinomas contributes to the growth and survival of oral cancer cells. *Mol Med Rep* **2012**, *6*, 675-681, doi:10.3892/mmr.2012.971.
